# Supplementary material for: Defect-rich Pd@PdOs nanobelts for electrocatalytic oxidation of ethylene glycol
Source: Royal Society of Chemistry journal article supplement (doi:10.1039/d4qi00319e), 2024-01-01
Supplement: d4qi00319e1.pdf [file d4qi00319e1.pdf]

## Supporting Information

### Defect-rich Pd@PdOs nanobelts for electrocatalytic oxidation of ethylene glycol

Xianlong Wang<sup>a</sup>, Xuewen Wei<sup>a</sup>, Ruifan Zhang<sup>a</sup>, Min Yan<sup>a</sup>, Ranran Wei<sup>a</sup>, Xiaoying Zhang<sup>a</sup>, Zhaoyou Zhu<sup>a</sup>, Yinglong Wang<sup>a</sup>, Xinling zhao<sup>b</sup>, Shuli Yin<sup>a,\*</sup>

<sup>a</sup> College of Chemical Engineering, Qingdao University of Science and Technology, 53 Zhengzhou Road, Qingdao 266042, P. R. China

<sup>b</sup> Department of Biological and Chemical Engineering, Shandong Vocational College of Science and Technology, 6388 West Ring Road, Weifang 261021, P. R. China

#### \* Corresponding Author

Shuli Yin

College of Chemical Engineering, Qingdao University of Science and Technology, 53 Zhengzhou Road, Qingdao 266042, P. R. China

\* E-mail: yinshuli@qust.edu.cn

## Experimental Section

### Materials Characterization

The morphology and structure of the samples were observed by transmission electron microscopy (TEM, Hitachi HT 7700, 120 kV; Themis Z (3.2)) and energy dispersive X-ray spectroscopy (EDX). The crystallographic data, surface electronic state and elemental composition of samples were investigated by X-ray diffractometer (XRD, PANalytical X'Pert) and X-ray photoelectron spectroscopy (XPS, ESCALAB MK II spectrometer) tests.

### Electrochemical measurement

All electrochemical measurements were performed on a CHI 760E electrochemical workstation, where Ag/AgCl served as reference electrodes and a Pt wire as the counter electrode. In the EGOR test, the glass carbon electrode (GCE) of the catalyst coating was used as a working electrode. Electrocatalyst ink was prepared by adding 2 mg catalyst to 1 mL solution containing 900  $\mu$ L water and 100  $\mu$ L Nafion (0.5 wt %). Then, 5  $\mu$ L electrocatalyst ink was poured on the polished GCE surface and dried in a 60  $^{\circ}$ C oven to obtain the working electrode. The required electrolytes were 1 M KOH (pH = 13.85) and 1 M KOH + 1 M EG (pH = 13.85). The measured potential was converted to a reversible hydrogen electrode (RHE) scale according to the equation  $E(\text{for RHE}) = E^{\theta}(\text{Ag/AgCl}) + E(\text{Ag/AgCl}) + 0.059 \times \text{pH}$ . According to the hydrogen desorption peak area of CV curve in 1 M KOH solution, the ECSA of electrocatalyst was calculated as follows:

$$\text{ECSA} = Q / m \times 420 \quad (1)$$

Where,  $m$  is the Pd load on the electrode surface,  $420 \mu\text{C cm}^{-2}$  is the reducing charge of the Pd oxide monolayer on the Pd surface, and  $Q$  is the reducing charge integral of the Pd oxide layer. CV curves were performed at a scan rate of  $50 \text{ mV s}^{-1}$ .

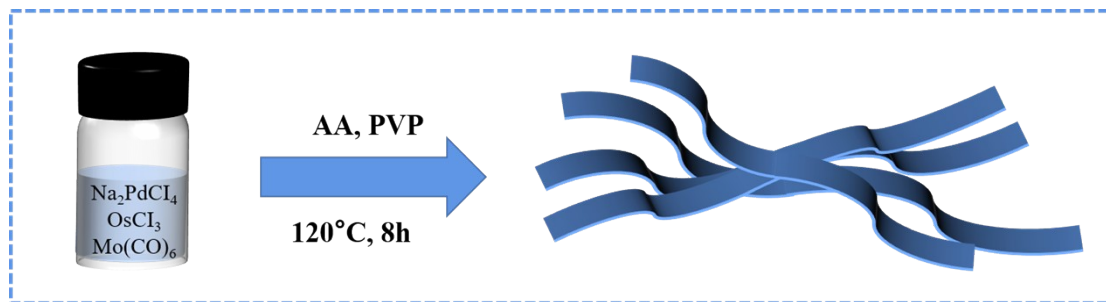

**Fig. S1** Schematic diagram of the preparation for the Pd@PdOs NBs.

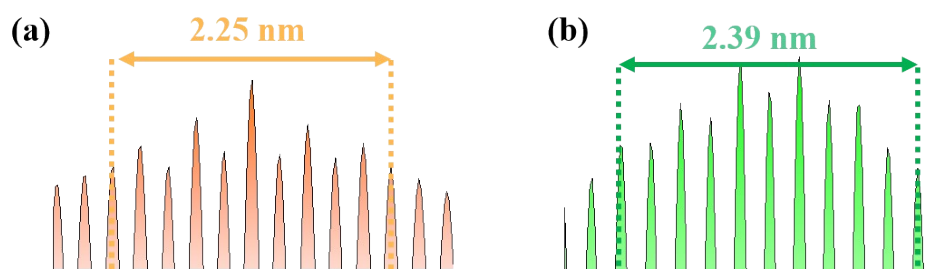

**Fig. S2** The intensity profile of the yellow (a) and green (b) box area in Fig. 1f.

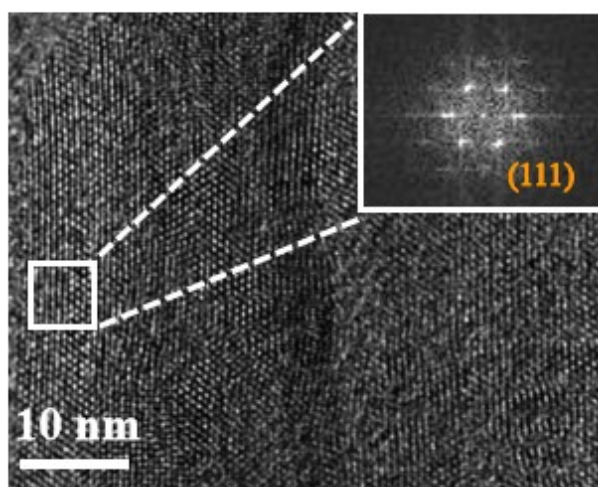

**Fig. S3** HRTEM image of Pd@PdOs NBs and corresponding FFT image.

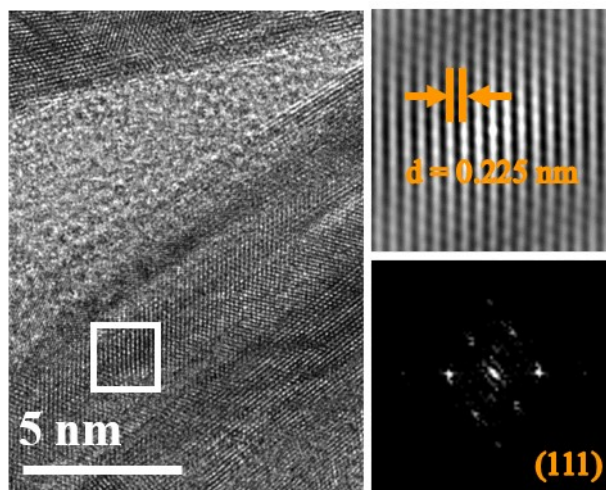

**Fig. S4** HRTEM image, lattice fringes image, and the corresponding FFT pattern of the Pd NBs.

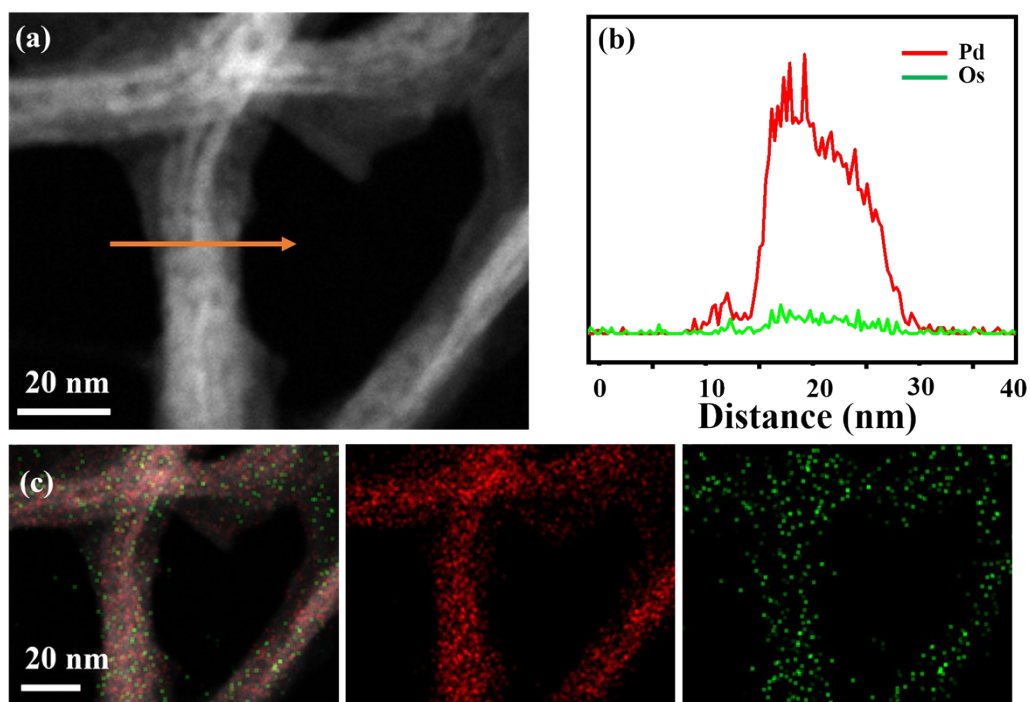

**Fig. S5** (a) HAADF-STEM image and (b) line-scan profile of Pd@PdOs NBs. (c) Elemental mapping images of the Pd@PdOs NBs.

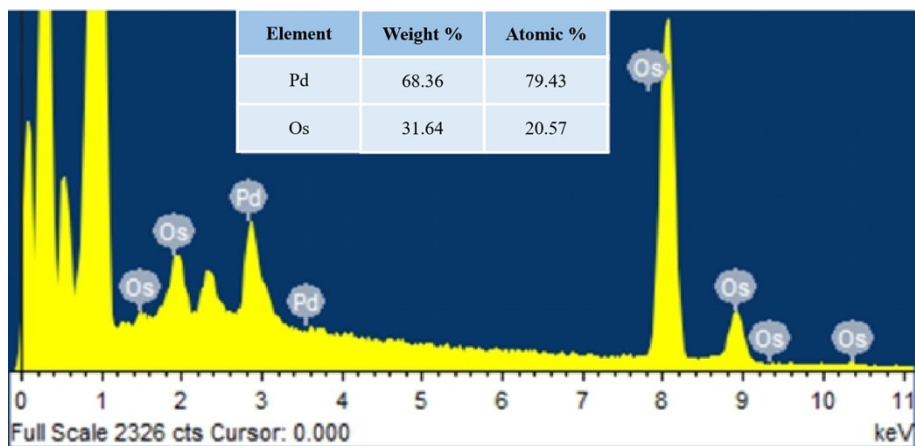

**Fig. S6** EDX spectrum of the Pd@PdOs NBs.

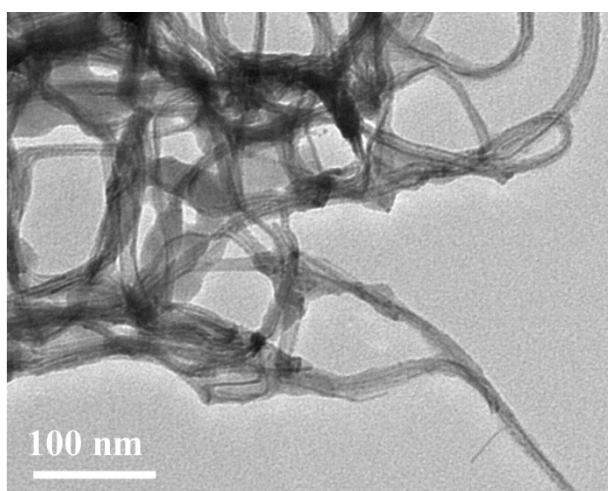

**Fig. S7** TEM image of the Pd NBs.

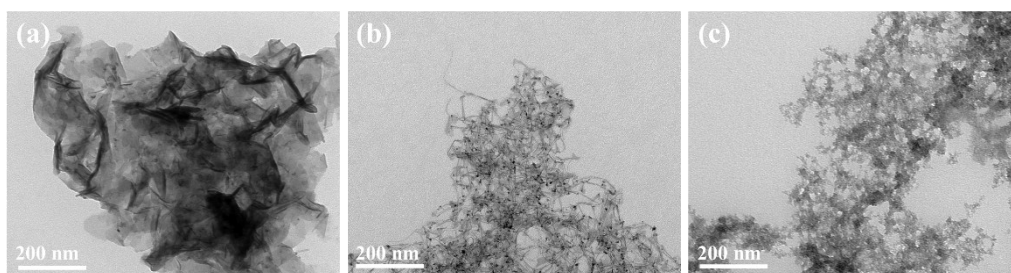

**Fig. S8** TEM images of the prepared samples by replacing  $\text{Mo}(\text{CO})_6$  with (a)  $\text{W}(\text{CO})_6$ , (b)  $\text{Cr}(\text{CO})_6$ , (c)  $\text{Fe}_2(\text{CO})_9$  under the typical synthesis conditions.

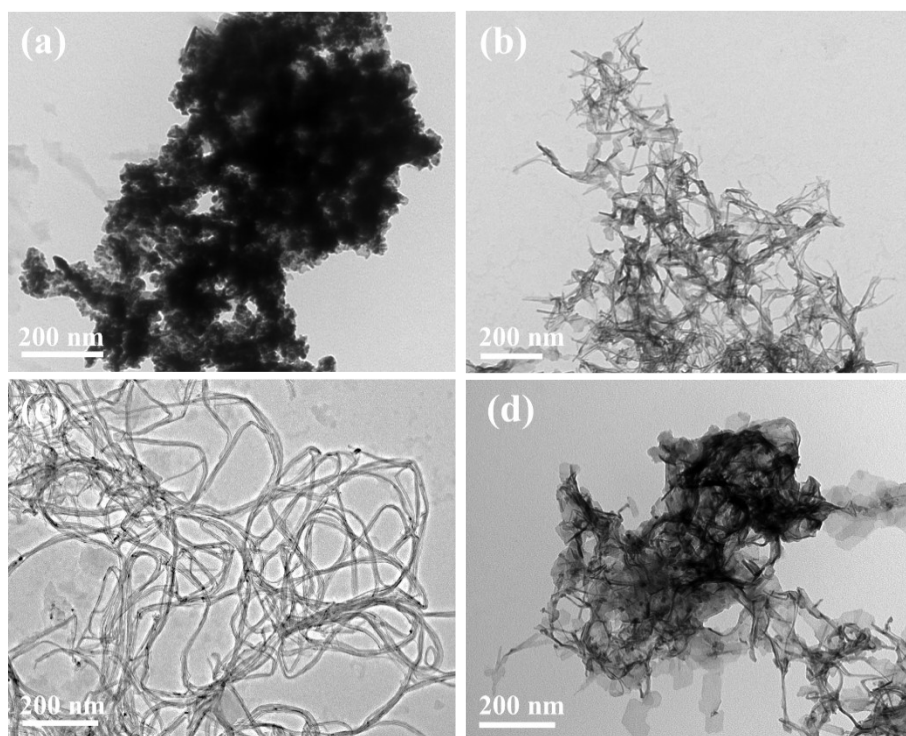

**Fig. S9** TEM images of the prepared samples at different PVP contents under the typical synthesis conditions: (a) 0 mg, (b) 200 mg, (c) 600 mg, (d) 1200 mg.

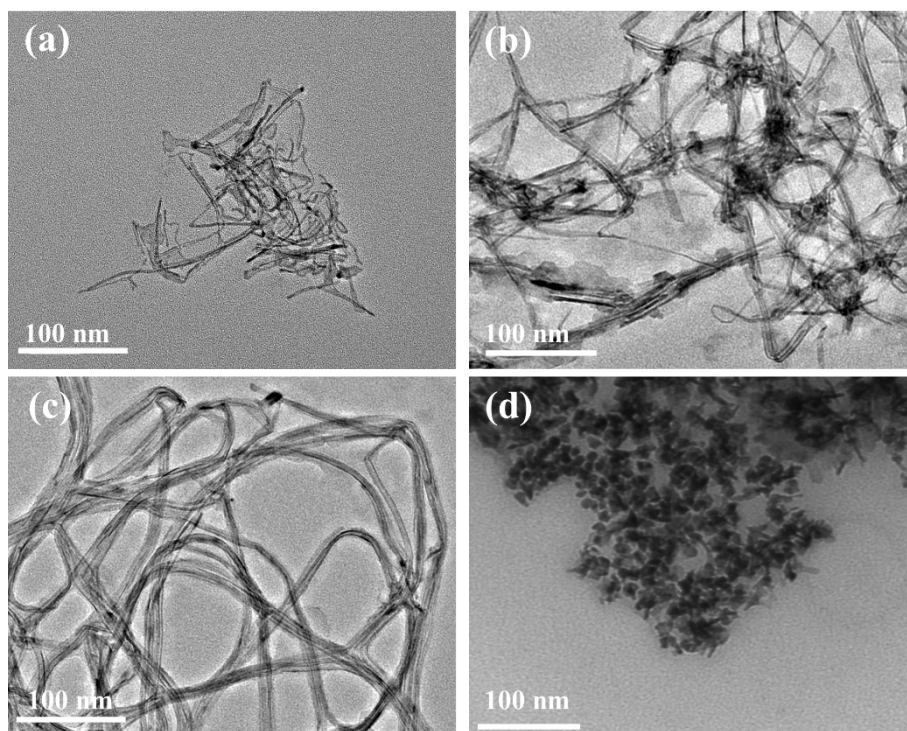

**Fig. S10** TEM images of the prepared samples at different AA contents under the typical synthesis conditions: (a) 0 mg, (b) 40 mg, (c) 80 mg, (d) 120 mg.

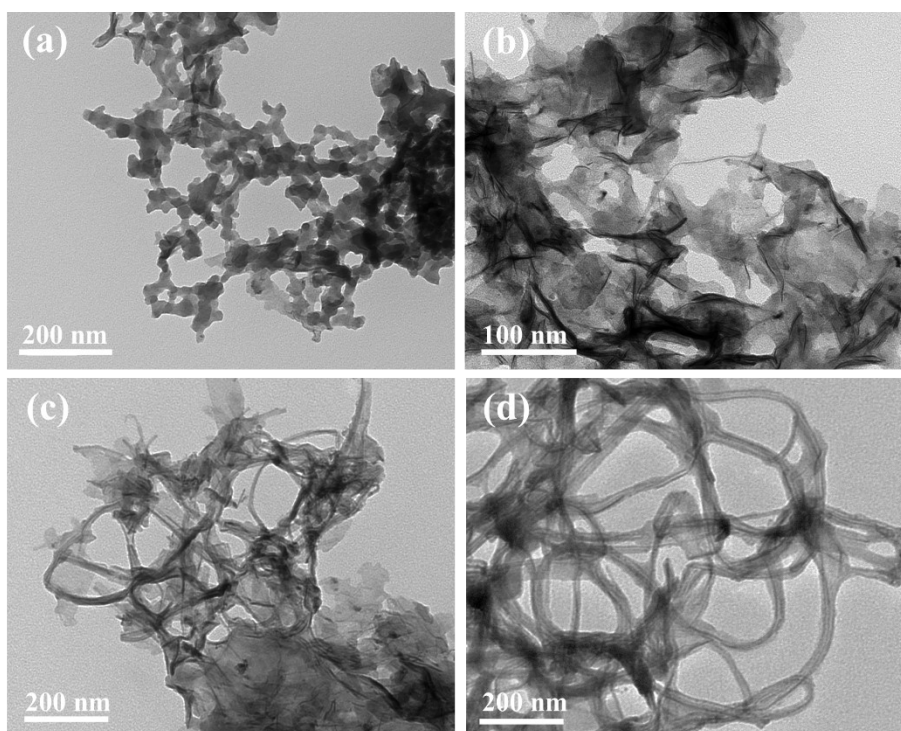

**Fig. S11** TEM images of the prepared samples at different reaction times under the typical synthesis conditions: (a) 10 min, (b) 1 h, (c) 2 h, (d) 4 h.

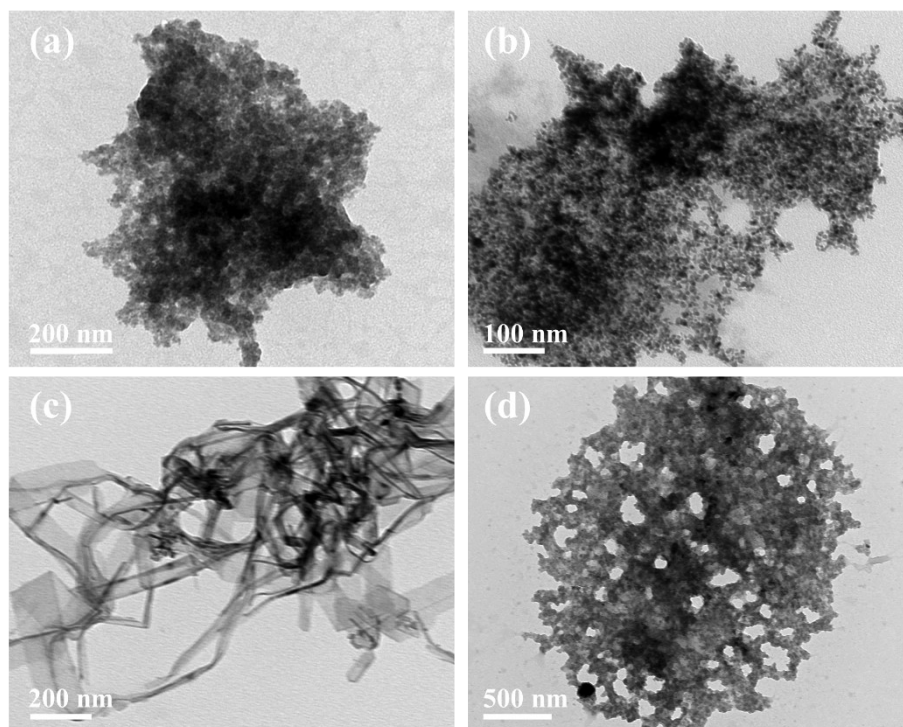

**Fig. S12** TEM images of the prepared samples by replacing ethylenediamine with (a) DMF, (b) aniline, (c) DETA (d) ethanol under the typical synthesis conditions.



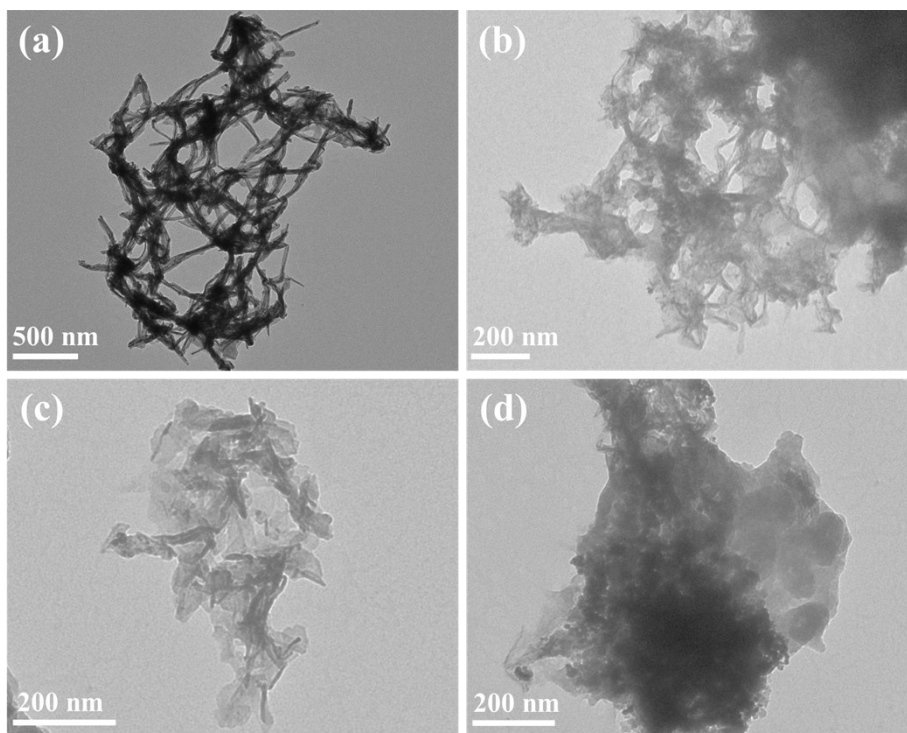

**Fig. S13** TEM images of the samples with different ratio of Pd:Os: (a) 1:0, (b) 1:1, (c) 1:2 and (d) 1:4, respectively.

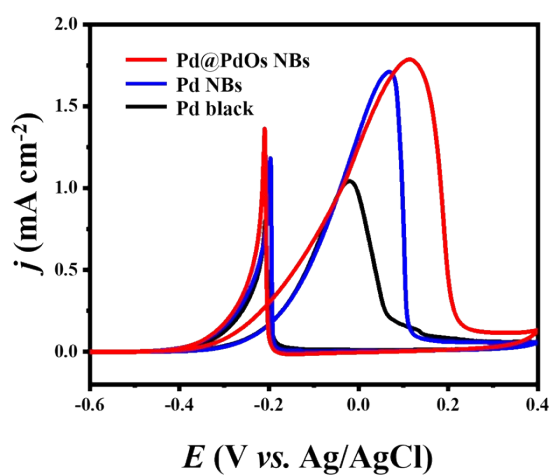

**Fig. S14** ECSA-normalized CVs of EGOR for various electrocatalysts at a scan rate of  $50 \text{ mV s}^{-1}$  in  $1 \text{ M KOH} + 1 \text{ M EOG}$  solution.

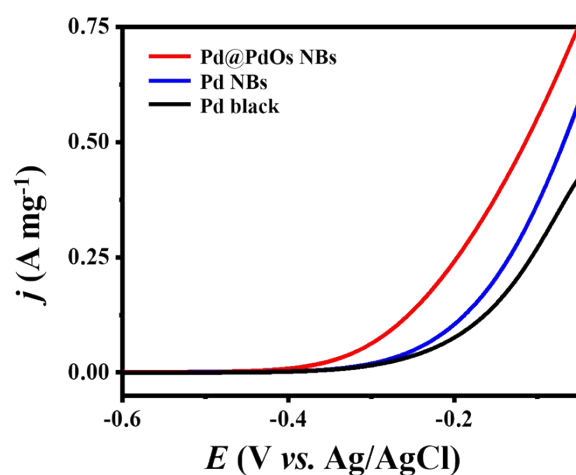

Fig. S15 A partial enlargement of Fig. 3c.

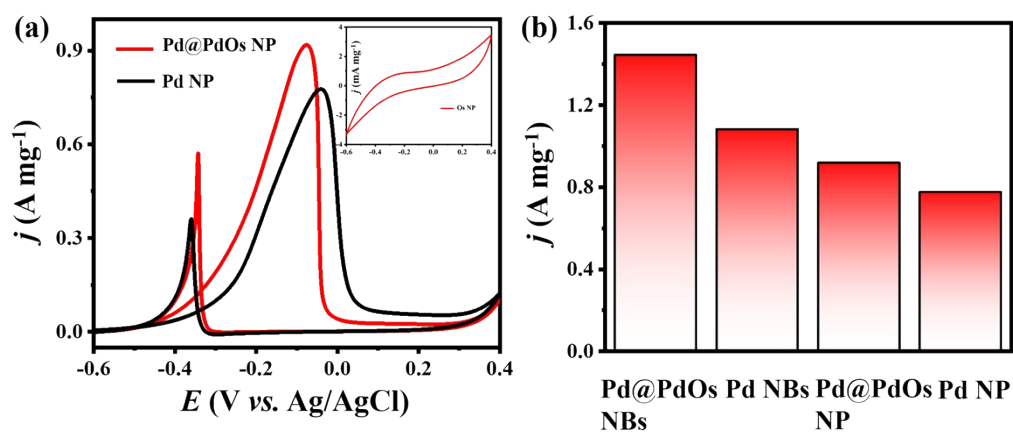

Fig. S16 (a) CVs of Pd@PdOs NP, Pd NP and Os NP. (b) The comparison for MA of various catalysts at a scan rate of 50 mV s<sup>-1</sup> in 1 M KOH + 1 M EGA solution.

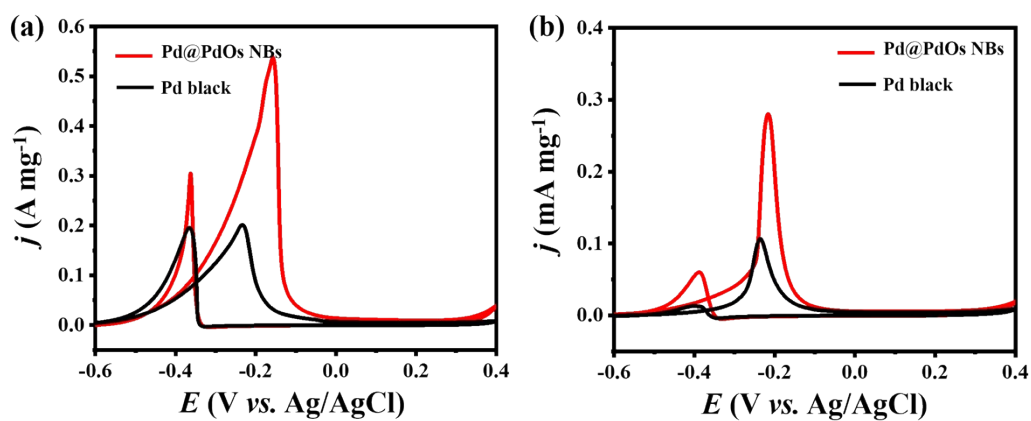

**Fig. S17** (a) CVs of Pd@PdOs NBs and Pd black at a scan rate of  $50 \text{ mV s}^{-1}$  in  $1 \text{ M KOH} + 1 \text{ M C}_2\text{H}_5\text{OH}$  solution. (b) CVs of Pd@PdOs NBs and Pd black at a scan rate of  $50 \text{ mV s}^{-1}$  in  $1 \text{ M KOH} + 1 \text{ M CH}_3\text{OH}$  solution.

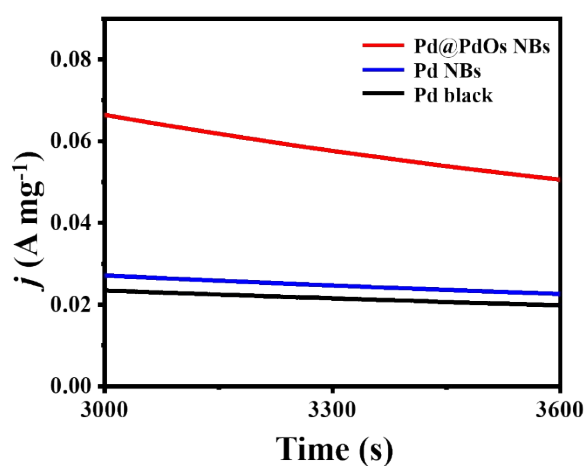

**Fig. S18** A partial enlargement of Fig. 4a.

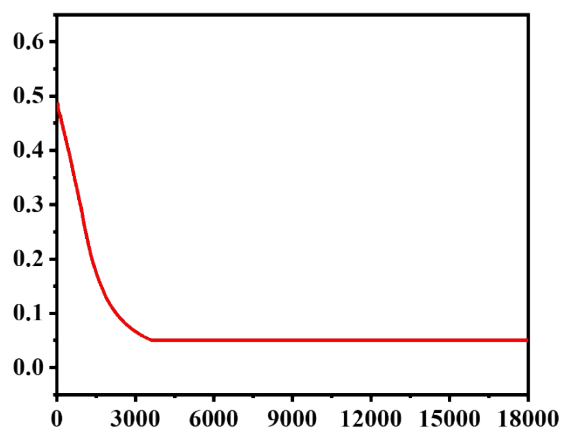

**Fig. S19** CA curve of Pd@PdOs NBs recorded at -0.1 V in 1 M KOH electrolyte containing 1 M EG.

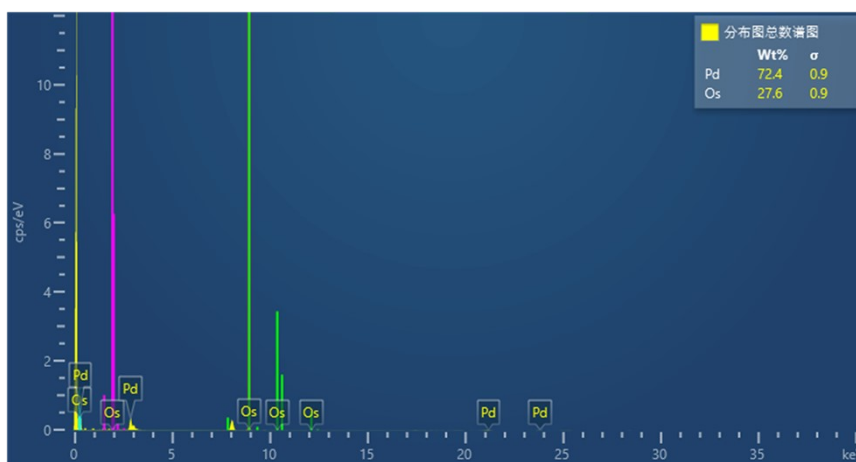

**Fig. S20** EDS spectrum of the PdOs NBs after 5h CA test.

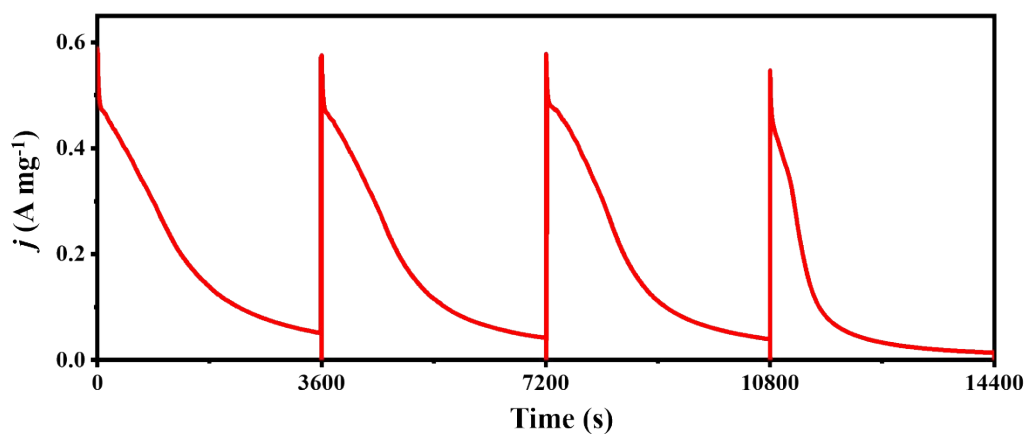

**Fig. S21** Long-term curves of Pd@PdOs NBs recorded at -0.1 V vs. Ag/AgCl in 1 M KOH + 1 M EG solution.

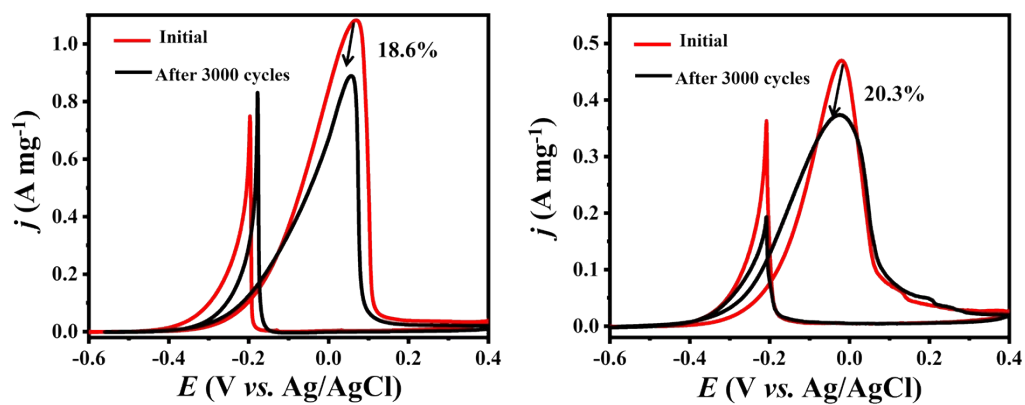

**Fig. S22** CV curves of Pd NBs and Pd black before and after 3000 cycles.

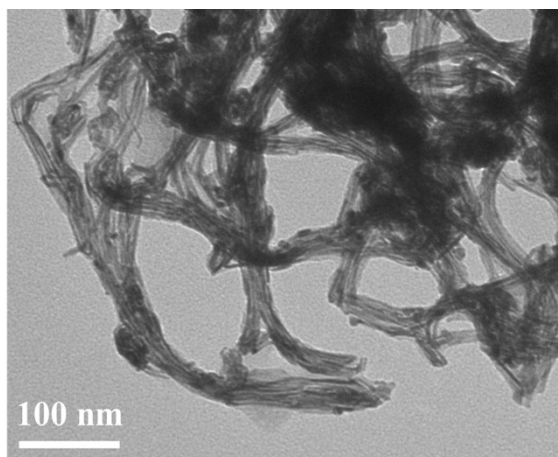

**Fig. S23** TEM image of the Pd@PdOs NBs after the 3000 CV test.

**Table S1.** Comparison with other Pd-based catalysts for EGOR.

| Catalysts                                   | Electrolyte                        | MA (A mg <sup>-1</sup> <sub>Pd</sub> ) | Reference |
|---------------------------------------------|------------------------------------|----------------------------------------|-----------|
| Pd@PdOs NBs                                 | 1 M KOH + 1 M EG                   | 1.45                                   | This work |
| Pd-Ni(OH) <sub>2</sub>                      | 1 M KOH + 1 M EG                   | 0.8                                    | [1]       |
| PtNi <sub>0.56</sub> Pd <sub>1.42</sub> NWs | 0.1 M HClO <sub>4</sub> + 0.5 M EG | 0.54                                   | [2]       |
| Pd/FNO-2.5                                  | 0.5 M KOH + 1 M EG                 | 0.38                                   | [3]       |
| 0.5%Ga@10%PdAgCo                            | 1 M KOH + 1 M EG                   | 0.298                                  | [4]       |
| PdP (2:1)/GE                                | 1 M KOH + 1 M EG                   | 0.264                                  | [5]       |
| PdCu/PT-SG                                  | 1 M KOH + 1 M EG                   | 1.07                                   | [6]       |

**References**

- [1] Liu, F., Gao, X., Shi, R., Guo, Z., Edmund C. M.Tse, Chen, Yong. Concerted and selective electrooxidation of polyethylene-terephthalate-derived alcohol to glycolic acid at an industry-level current density over a Pd-Ni(OH)<sub>2</sub> catalyst. *Angew. Chem. Int. Ed.*, 2023, e202300094.
- [2] Zhang, N., Feng, Y., Zhu, X., Guo, S., Guo, J., Huang, X. Superior bifunctional liquid fuel oxidation and oxygen reduction electrocatalysis enabled by PtNiPd core-shell nanowires. *Adv. Mater.*, 2016, 29, 1603774
- [3] Qi, L., Jiang, J., Sun, Y., Xie, F., Zhao, Y., Wan, L., Lü, C. Ultra-efficient electrooxidation of ethylene glycol enable by Pd-loaded Fe-doped Nb<sub>2</sub>O<sub>5</sub> with abundant oxygen vacancies. *Chem. Eng. J.*, 2023, 475, 146050.
- [4] Kıvrak, H., Aktaş, N. Promoting formic acid and ethylene glycol electrooxidation activity on Ga modified Pd based catalysts. *Int. J. Hydrog. Energy*, 2022, 47(83), 35265-35274.
- [5] Su, W., Sun, R., Ren, F., Yao, Y., Fei, Z., Wang, H., Liu, Z., Rong, X., Du, Y. Graphene supported palladium-phosphorus nanoparticles as a promising catalyst for ethylene glycol oxidation. *Appl. Surf. Sci.*, 2019, 491, 735-741.

[6] Zhang, Q., Han, W., Huang, R., Bai, Z., Yang, L., Jiang, K., Qiao, J. Palladium/Copper alloy hollow nanocubes supported on sulfur-doped graphene as highly efficient catalyst for ethylene glycol oxidation. *ChemistrySelect*, 2019, 4(33), 9716-9721.
